# Supplementary material for: Degradation Patterns of GH11 xylanases for Efficiently Hydrolyzing xylan in Aspergillus Niger An76
Source: Research Square preprint supplement (doi:10.21203/rs.3.rs-148690/v1), 2021-01-19
Supplement: Supplementary file 1 [file 6c04c4f4a8fb5873fb9ebb2d.docx]

**Additional file**

**Degradation patterns of GH11 xylanases for efficiently hydrolyzing xylan in *Aspergillus niger* An76**

Shu Zhang1, Sha Zhao1,3, Weihao Shang1, Xiuyun Wu1,2*, Yingjie Li1, Guanjun Chen1, Xinli Liu2, Lushan Wang1

1State Key Laboratory of Microbial Technology, Institute of Microbial Technology, Shandong University, Qingdao, Shandong, 266237, China

2State Key Laboratory of Biobased Material and Green Papermaking，Qilu University of Technology，Shandong Academy of Sciences, Jinan, Shandong, 250353, China

3School of Life Sciences, Shandong University, Qingdao, Shandong, 266237, China

***Corresponding author:** Xiuyun Wu

**E-mail:** wuxiuyun3353@163.com

**Fax:** +86**-0**532**-**58631569

**Email addresses:**

Shu Zhang: zhshu177@163.com

Sha Zhao: 1374117784@qq.com

Weihao Shang: 201932447@mail.sdu.edu.cn

Yingjie Li: sdliyingjie@163.com

Guanjun Chen: guanjun@sdu.edu.cn

Xinli Liu: liuxl@qlu.edu.cn

Lushan Wang: lswang@sdu.edu.cn


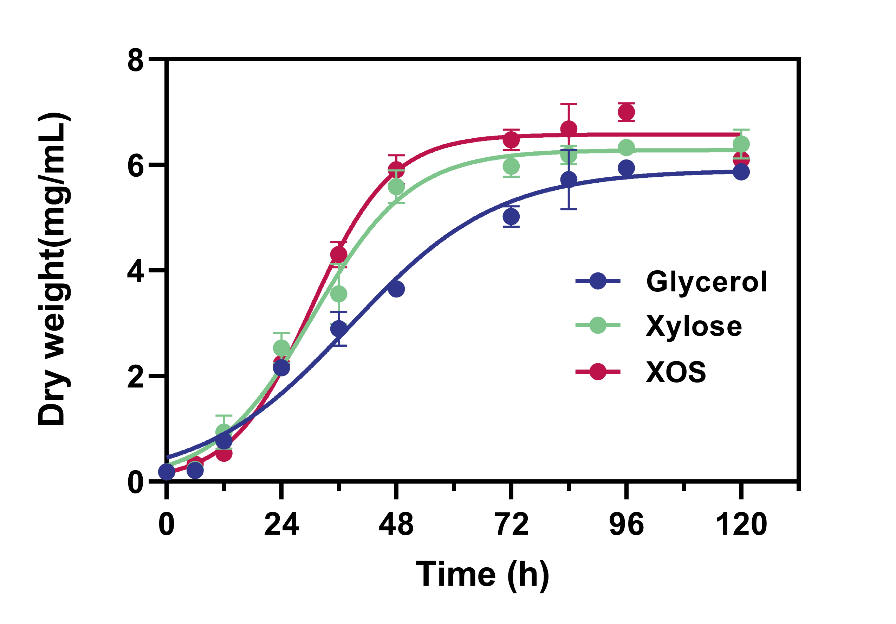


**Fig. S1 Growth condition of *A. niger* An76 on different carbon sources.** The growth curves by using 1.0% glycerol, xylose and XOS as carbon sources.

**
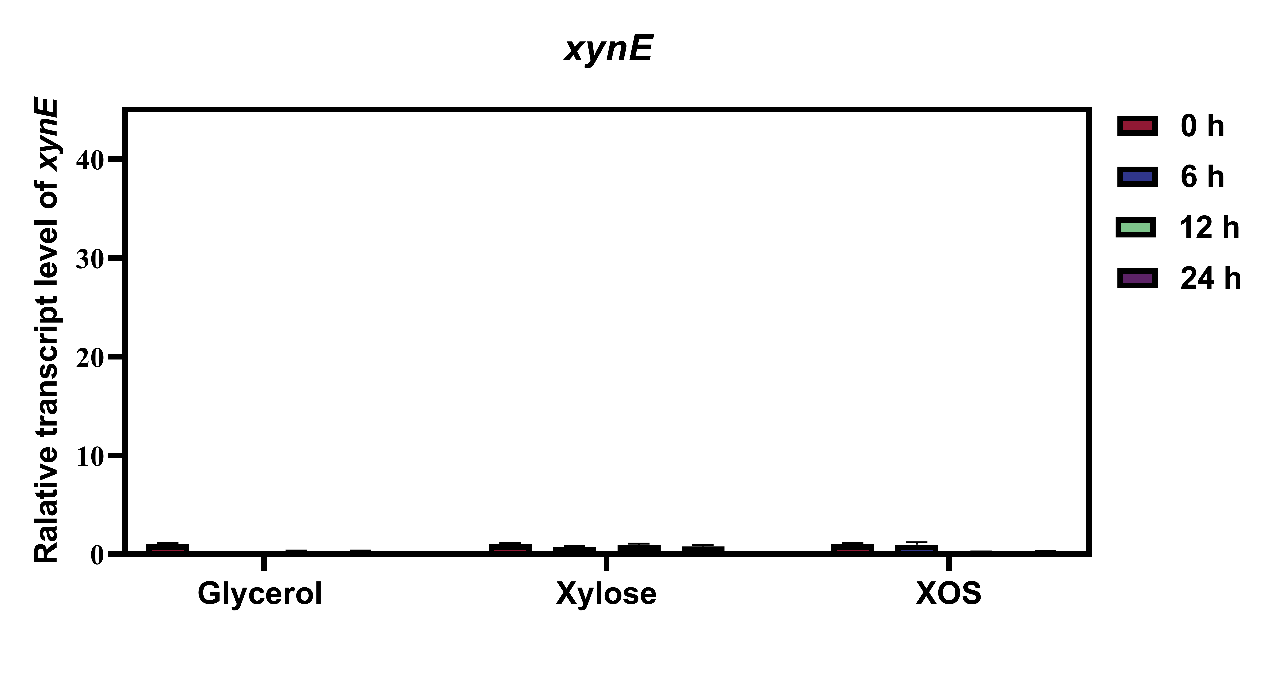
**

**Fig. S2 Relative transcript levels of *xynE* in *A. niger* An76 induced by 1% glycerol, xylose and XOS at 0, 6, 12, and 24 h.**


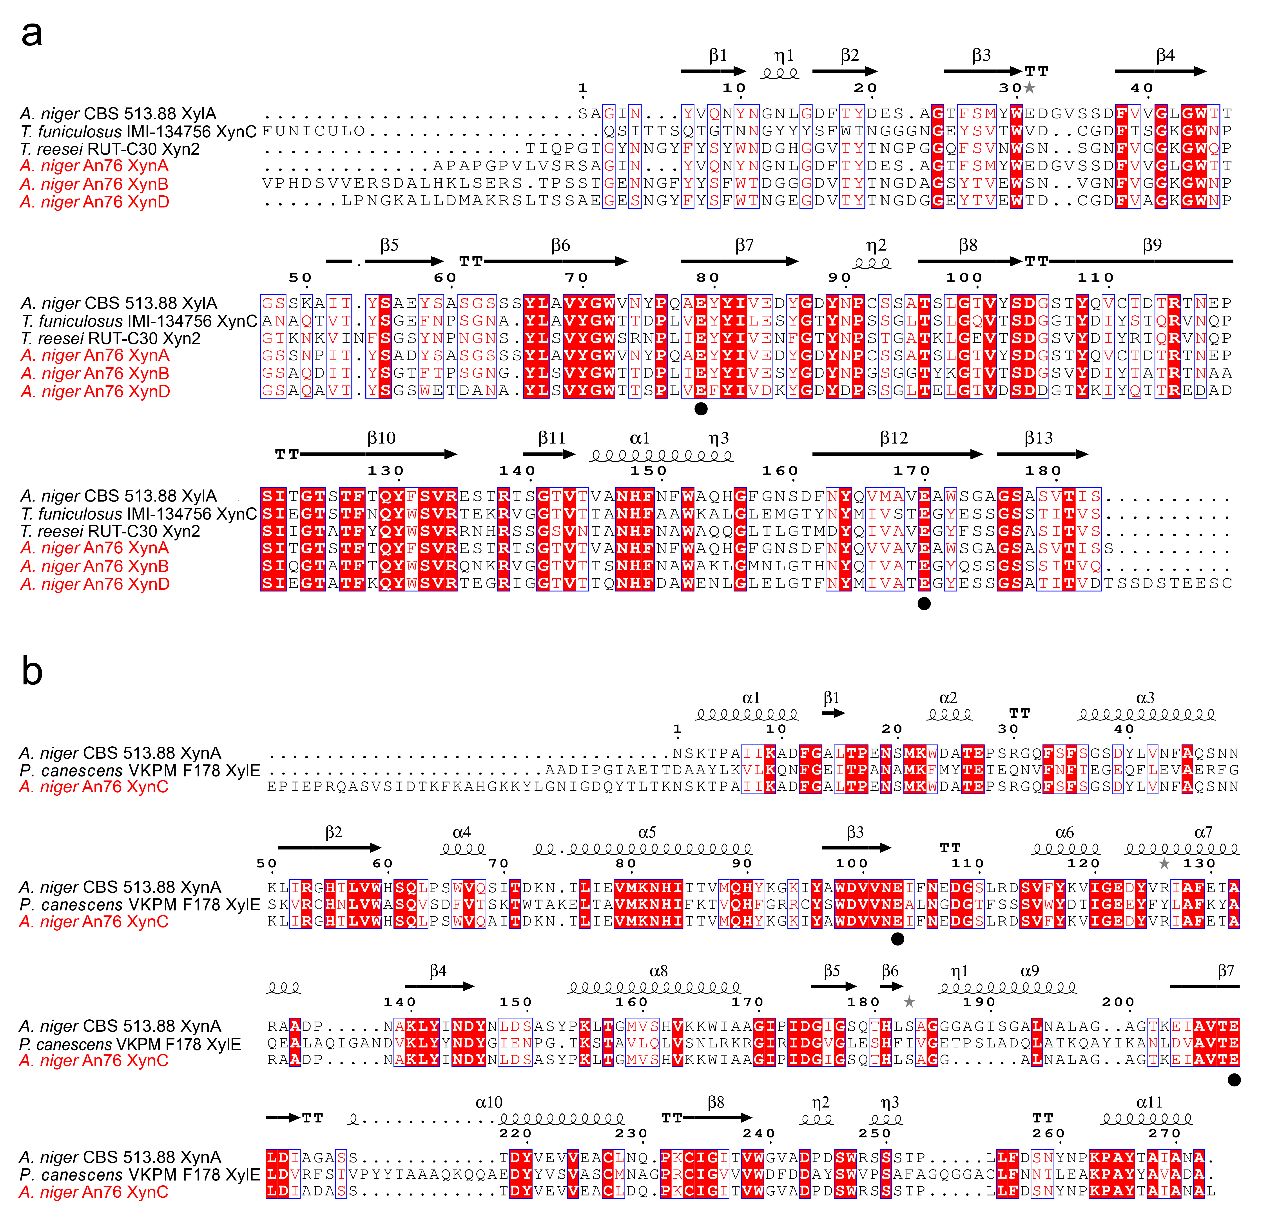


**Fig. S3 Sequence alignment of XynA, XynB, XynC and XynD with related GH11 and GH10 xylanases.** (**a**), Alignment of XynA, XynB, XynD from *Aspergillus. niger* An 76 and XylA from *Aspergillus. niger* CBS 513.88, XynC from *Talaromyces funiculosus* IMI-134756 and Xyn2 from *Trichoderma reesei* RUT-C30. (**b**) GH10 xylanases alignment includes XynC from *Aspergillus. niger* An 76 and XynA from *Aspergillus. niger* CBS 513.88 and Xyn2 from *Penicillium canescens* VKPM F178. Strictly conserved residues are highlighted by a red background, and conservatively substituted residues are boxed. Catalytic amino acids are shown as black dots.


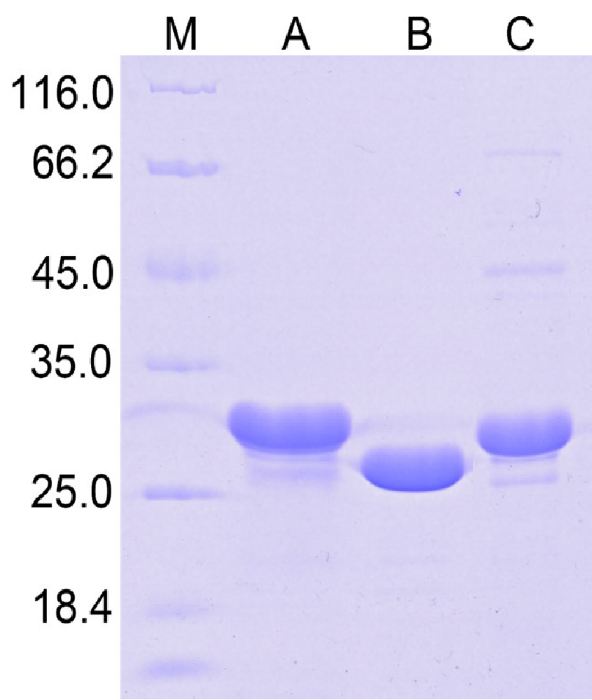


**Fig. S4 SDS-PAGE analysis of three GH11 xylanases from *A. niger* An76 expressed in *E. coli* strain BL21 (DE3).** Lane M: protein molecular weight marker; lane 1: XynA; lane 2: XynB; lane 3: XynD.


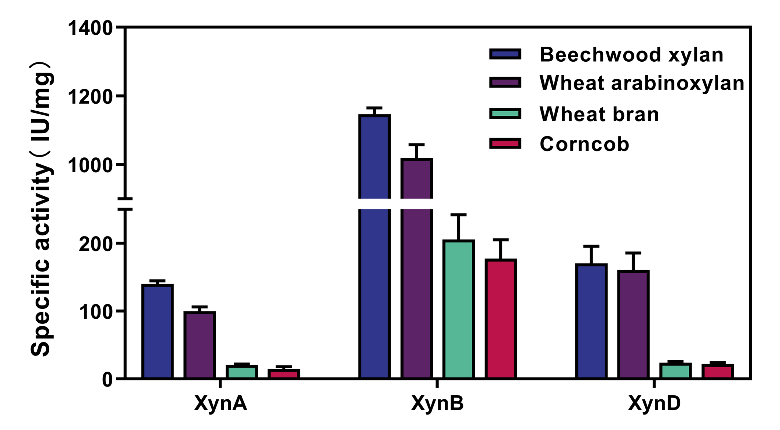


**Fig. S5 The specific activities of the three xylanases on various substrates.**


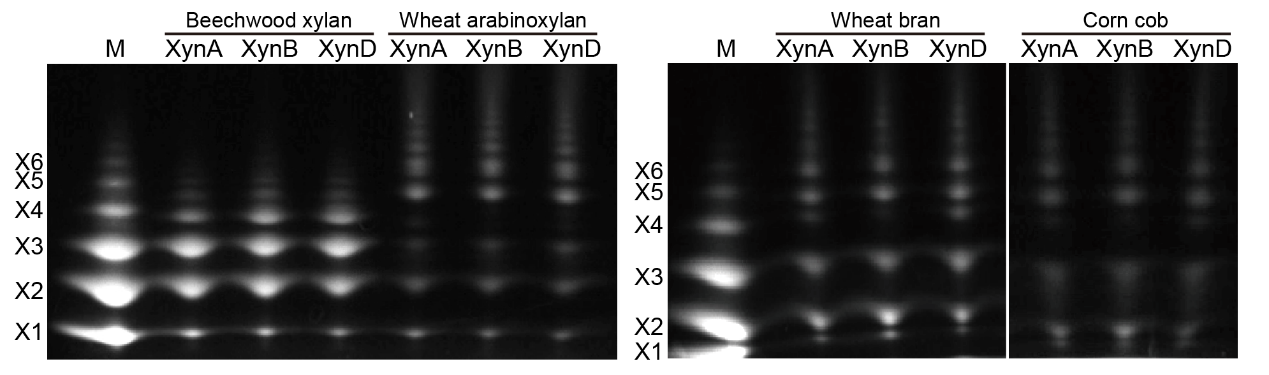


**Fig. S6 FACE analysis of the products after hydrolysis of various xylans by XynA, XynB and XynD.** Four substrates (beechwood xylan, wheat arabinoxylan, wheat bran, and corn cob) were hydrolyzed by XynA, XynB and XynD for 12 h under optimal conditions. Mixture of xylose (X1), xylobiose (X2), xylotriose (X3), xylotetraose (X4), xylopentaose (X5), xylohexaose (X6) was used as standards makers.


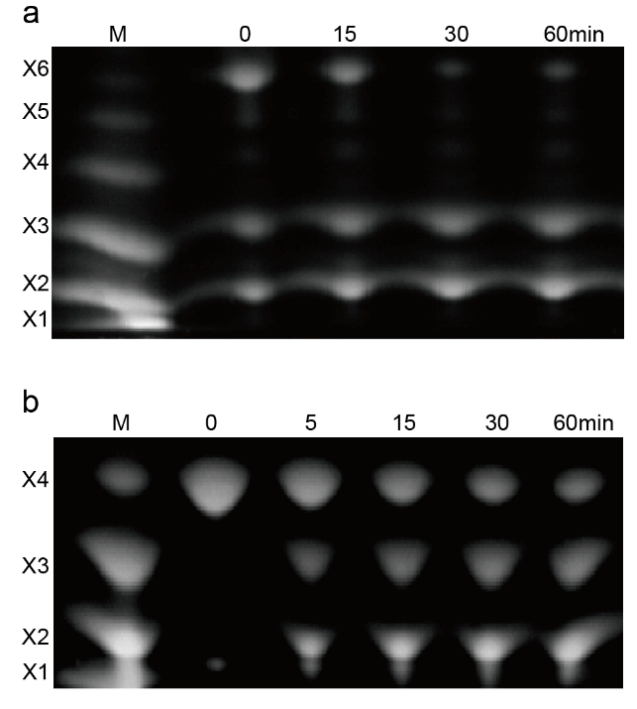


**Fig. S7 FACE analysis of products following hydrolysis of xylohexaose (a) and xylotetraose (b) by XynD. a** The products of xylohexaose hydrolyzed by XynD. **b** The products of xylotetraose hydrolyzed by XynD. Xylose (X1), xylobiose (X2), xylotriose (X3), xylotetraose (X4), xylopentaose (X5), xylohexaose (X6).

**Table S1 Primers used in this study.**

| **Primer** | **Primer purpose** | **Sequence (from 5′ to 3′)** |
| --- | --- | --- |
| xynA-f | Expression primers | CATG*CCATGG*CGGCTCCTGCCCCGGGACCTGTTCTG |
| xynA-r | CCG*CTCGAG*TTAAGAAGAGATCGTGACACTGGCGCT |
| xynB-f | CATG*CCATGG*CGGTTCCCCACGACTCTGTCGTCGAG |
| xynB-r | CCG*CTCGAG*TTACTGAACAGTGATGGAGGAAGATCC |
| xynD-f | CATG*CCATGG*CGCTCCCCAACGGTAAGGCCCTGCTG |
| xynD-r | CCG*CTCGAG*TTAGCAGCTCTCCTCAGTGCTGTCAGA |
| gapdh-qf | Quantitative-PCR primers | ATTTTGGTGTTGCTCAGGG |
| gapdh-qr | CGGCGGTTCTTCTTGCTAT |
| xynA-qf | AAACGAACCGTCCATCACA |
| xynA-qr | GCAACAGTCACCGTTCCAG |
| xynB-qf | ACGGCTTCTACTACTCCTTCTG |
| xynB-qr | AGCCCTTTCCACCAACAA |
| xynC-qf | TCGGGATCGGATTACCTG |
| xynC-qr | TTTGTCCGTGATGGCTTG |
| xynD-qf | ACAGCGGATCTTGGGAAAC |
| xynD-qr | CAGAGGAGGGGTCGTAGTCA |

The italic sequences indicated the recognition sequence of restriction endonuclease *Nco*I and *Xho*I,, respectively.

**Table S2 Endo-β-1,4-xylanases of *Aspergillus niger* An76**

| **Gene ID** | **Gene name** | **cDNA*/bp** | **CAZy family** | **EC** | **Signal peptide** | **Number of XlnR binding sitesa** |
| --- | --- | --- | --- | --- | --- | --- |
| g9709.t1 | *xynA* | 585 | GH11 | 3.2.1.8 | + | 4 |
| g10033.t1 | *xynB* | 621 | GH11 | 3.2.1.8 | + | 2 |
| g1233.t1 | *xynC* | 906 | GH10 | 3.2.1.8 | + | 0 |
| g1345.t1 | *xynD* | 636 | GH11 | 3.2.1.8 | + | 0 |
| g3744.t1 | *xynE* | 687 | GH11 | 3.2.1.8 | + | 0 |

**a** Consensus region of XlnR binding sites: 5`-GGCTAATAA or 5`-GGCTAR (R: A or G).
